# Supplementary material for: Intrinsic and interfacial kinetics of perovskite solar cells under photo and bias-induced degradation and recovery
Source: Royal Society of Chemistry journal article supplement (doi:10.1039/c7tc02652h), 2017-01-01
Supplement: c7tc02652h1.pdf [file c7tc02652h1.pdf]

## Supporting Information

### Intrinsic and interfacial kinetics of perovskite solar cell under photo and bias-induced degradation and recovery

P. Yadav,<sup>a,\*</sup> D. Prochowicz,<sup>a,b</sup> E. A. Alharbi,<sup>a</sup> Shaik M. Zakeeruddin<sup>a</sup> and Michael Grätzel<sup>a</sup>

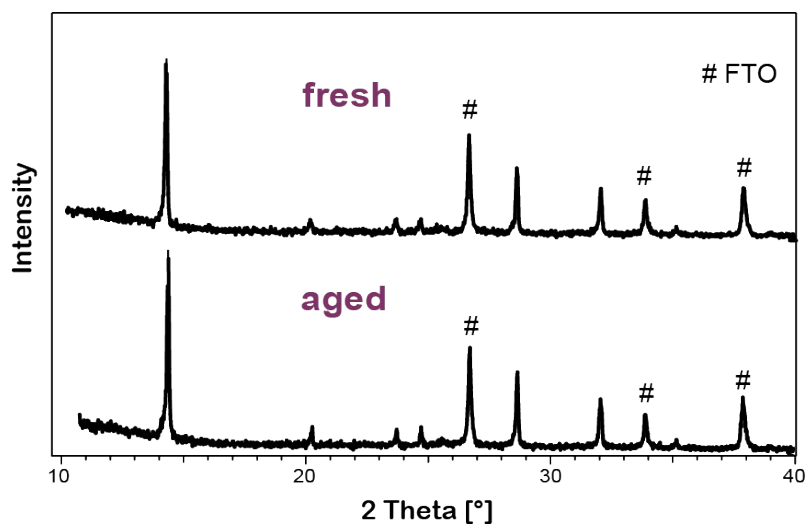

**Figure S1.** XRD spectra of freshly prepared perovskite absorber layer and aged samples
